# Supplementary material
Source: ML conference proceedings conference paper supplement (https://openaccess.thecvf.com/content/ICCV2025/html/Wei_ViT-Linearizer_Distilling_Quadratic_ICCV_2025_paper.html)
Supplement: Supplementary file 1 [file Wei_ViT-Linearizer_Distilling_Quadratic_ICCV_2025_supplemental.pdf]

## Appendix

### A. Technical Details

**Model configurations.** In all our experiments, we use ViT as the teacher model and Adventurer as the student model—both featuring a plain (non-hierarchical) design that maintains consistent spatial resolutions across layers. Their detailed configurations are summarized in Table 7.

| Model                                       | Embedding dimension | MLP dimension | Blocks | Parameters |
|---------------------------------------------|---------------------|---------------|--------|------------|
| ViT-Base, Patch size $16 \times 16$         | 768                 | 3,072         | 12     | 86M        |
| ViT-Large, Patch size $14 \times 14$        | 1,024               | 4,096         | 24     | 307M       |
| Adventurer-Small, Patch size $16 \times 16$ | 512                 | 1,280         | 12     | 44M        |
| Adventurer-Base, Patch size $16 \times 16$  | 768                 | 1,920         | 12     | 99M        |
| Adventurer-Large, Patch size $14 \times 14$ | 1,024               | 2,560         | 24     | 346M       |

Table 7. Detailed configuration of the models used in this paper.

**Training recipes.** In our distillation stage, we did not perform extensive hyperparameter tuning. Instead, we mainly followed the settings adopted in prior ViT-based masked distillation studies [36], but applied stronger data augmentation and higher drop path rates, which previous findings [46, 47] suggest are better suited for Mamba-style models. Detailed hyperparameters can be found in Table 8 and 9. For semantic segmentation fine-tuning, we simply follow the recipe in [36].

| Config                       | Small/Base | Large |
|------------------------------|------------|-------|
| optimizer                    | AdamW      |       |
| peak learning rate           | 1.5e-3     |       |
| minimum learning rate        | 1e-5       |       |
| weight decay                 | 0.05       |       |
| epochs                       | 300        |       |
| optimizer betas              | 0.9, 0.999 |       |
| batch size                   | 2048       |       |
| warmup epochs                | 10         | 20    |
| stochastic depth (drop path) | 0.1        | 0.2   |
| layer-wise lr decay          | ✗          |       |
| label smoothing              | ✗          |       |
| random erasing               | ✗          |       |
| Rand Augmentation            | ✗          |       |
| repeated augmentation        | ✓          |       |
| ThreeAugmentation            | ✓          |       |

Table 8. Configurations of the distillation stage.

| Config                       | Small/Base           | Large |
|------------------------------|----------------------|-------|
| optimizer                    | AdamW                |       |
| peak learning rate           | 5e-4                 |       |
| minimum learning rate        | 1e-6                 |       |
| weight decay                 | 0.05                 |       |
| epochs                       | 100                  | 50    |
| optimizer betas              | 0.9, 0.999           |       |
| batch size                   | 1024                 |       |
| warmup epochs                | 20                   | 5     |
| stochastic depth (drop path) | 0.4                  | 0.6   |
| layer-wise lr decay          | 0.65                 | 0.8   |
| label smoothing              | ✓                    |       |
| random erasing               | ✗                    |       |
| Rand Augmentation            | rand-m9-mstd0.5-inc1 |       |

Table 9. Configurations of the fine-tuning stage.
